# Supplementary material for: PQ, a new program for phylogeny reconstruction
Source: BMC Bioinformatics. 2018 Oct 12;19:374. doi: 10.1186/s12859-018-2399-4 (PMC6186109; doi:10.1186/s12859-018-2399-4)
Supplement: Supplementary file 1 — Organism sets. The MS-Excel file Organisms.xlsx contains lists of organisms from three species sets, with the Uniprot mnemonics that are used in Additional files 2 and 3. (XLSX 23 kb) [file 12859_2018_2399_MOESM1_ESM.xlsx]

## Sheet: Fungi
Organism	Mnemonic	Phylum	Subphylum	Class	Order	Family	Genus	Species
Ajellomyces capsulatus G186AR	AJECG	Ascomycota	Pezizomycotina	Eurotiomycetes	Onygenales	Ajellomycetaceae	Histoplasma	Histoplasma capsulatum
Arthroderma gypseum CBS 118893	ARTGP	Ascomycota	Pezizomycotina	Eurotiomycetes	Onygenales	Arthrodermataceae	Microsporum	Microsporum gypseum
Aspergillus fumigatus Af293	ASPFU	Ascomycota	Pezizomycotina	Eurotiomycetes	Eurotiales	Aspergillaceae	Aspergillus	Aspergillus fumigatus
Botryotinia fuckeliana B05.10	BOTFB	Ascomycota	Pezizomycotina	Leotiomycetes	Helotiales	Sclerotiniaceae	Botrytis	Botrytis cinerea
Candida dubliniensis CD36	CANDC	Ascomycota	Saccharomycotina	Saccharomycetes	Saccharomycetales	Debaryomycetaceae	Candida	Candida dubliniensis
Chaetomium thermophilum var. thermophilum DSM 1495	CHATD	Ascomycota	Pezizomycotina	Sordariomycetes	Sordariales	Chaetomiaceae	Chaetomium	Chaetomium thermophilum
Coccidioides posadasii C735 delta SOWgp	COCP7	Ascomycota	Pezizomycotina	Eurotiomycetes	Onygenales	Onygenales incertae sedis	Coccidioides	Coccidioides posadasii
Aspergillus nidulans FGSC A4	EMENI	Ascomycota	Pezizomycotina	Eurotiomycetes	Eurotiales	Aspergillaceae	Aspergillus	Aspergillus nidulans
Exophiala dermatitidis NIH/UT8656	EXODN	Ascomycota	Pezizomycotina	Eurotiomycetes	Chaetothyriales	Herpotrichiellaceae	Exophiala	Exophiala dermatitidis
Cryptococcus neoformans var. neoformans JEC21	CRYNJ	Basidiomycota	Agaricomycotina	Tremellomycetes	Tremellales	Cryptococcaceae	Cryptococcus	Cryptococcus neoformans
Fusarium oxysporum Fo5176	FUSOF	Ascomycota	Pezizomycotina	Sordariomycetes	Hypocreales	Nectriaceae	Fusarium	Fusarium oxysporum species complex
Glomerella graminicola M1.001	COLGM	Ascomycota	Pezizomycotina	Sordariomycetes	Glomerellales	Glomerellaceae	Colletotrichum	Colletotrichum graminicola
Grosmannia clavigera kw1407	GROCL	Ascomycota	Pezizomycotina	Sordariomycetes	Ophiostomatales	Ophiostomataceae	Grosmannia	Grosmannia clavigera
Trichoderma virens Gv29-8	HYPVG	Ascomycota	Pezizomycotina	Sordariomycetes	Hypocreales	Hypocreaceae	Trichoderma	Trichoderma virens
Kazachstania africana CBS 2517	KAZAF	Ascomycota	Saccharomycotina	Saccharomycetes	Saccharomycetales	Saccharomycetaceae	Kazachstania	Kazachstania africana
Kluyveromyces lactis NRRL Y-1140	KLULA	Ascomycota	Saccharomycotina	Saccharomycetes	Saccharomycetales	Saccharomycetaceae	Kluyveromyces	Kluyveromyces lactis
Lachancea thermotolerans CBS 6340	LACTC	Ascomycota	Saccharomycotina	Saccharomycetes	Saccharomycetales	Saccharomycetaceae	Lachancea	Lachancea thermotolerans
Lodderomyces elongisporus NRRL YB-4239	LODEL	Ascomycota	Saccharomycotina	Saccharomycetes	Saccharomycetales	Debaryomycetaceae	Lodderomyces	Lodderomyces elongisporus
Magnaporthe oryzae 70-15	MAGO7	Ascomycota	Pezizomycotina	Sordariomycetes	Magnaporthales	Magnaporthaceae	Magnaporthe	Magnaporthe oryzae
Melampsora larici-populina 98AG31	MELLP	Basidiomycota	Pucciniomycotina	Pucciniomycetes	Pucciniales	Melampsoraceae	Melampsora	Melampsora larici-populina
Metarhizium acridum CQMa 102	METAQ	Ascomycota	Pezizomycotina	Sordariomycetes	Hypocreales	Clavicipitaceae	Metarhizium	Metarhizium acridum
Millerozyma farinosa CBS 7064	PICSO	Ascomycota	Saccharomycotina	Saccharomycetes	Saccharomycetales	Debaryomycetaceae	Millerozyma	Millerozyma farinosa
Mixia osmundae IAM 14324	MIXOS	Basidiomycota	Pucciniomycotina	Mixiomycetes	Mixiales	Mixiaceae	Mixia	Mixia osmundae
Candida glabrata CBS 138	CANGA	Ascomycota	Saccharomycotina	Saccharomycetes	Saccharomycetales	Saccharomycetaceae	Nakaseomyces	[Candida] glabrata
Naumovozyma dairenensis CBS 421	NAUDC	Ascomycota	Saccharomycotina	Saccharomycetes	Saccharomycetales	Saccharomycetaceae	Naumovozyma	Naumovozyma dairenensis
Nectria haematococca mpVI 77-13-4	NECH7	Ascomycota	Pezizomycotina	Sordariomycetes	Hypocreales	Nectriaceae	Fusarium	Nectria haematococca
Neosartorya fischeri NRRL 181	NEOFI	Ascomycota	Pezizomycotina	Eurotiomycetes	Eurotiales	Aspergillaceae	Aspergillus	Aspergillus fischeri
Neurospora crassa OR74A	NEUCR	Ascomycota	Pezizomycotina	Sordariomycetes	Sordariales	Sordariaceae	Neurospora	Neurospora crassa
Paracoccidioides brasiliensis Pb03	PARBP	Ascomycota	Pezizomycotina	Eurotiomycetes	Onygenales	Onygenales incertae sedis	Paracoccidioides	Paracoccidioides brasiliensis
Penicillium marneffei ATCC 18224	PENMQ	Ascomycota	Pezizomycotina	Eurotiomycetes	Eurotiales	Trichocomaceae	Talaromyces	Talaromyces marneffei
Pyrenophora teres f. teres 0-1	PYRTT	Ascomycota	Pezizomycotina	Dothideomycetes	Pleosporales	Pleosporaceae	Pyrenophora	Pyrenophora teres
Saccharomyces cerevisiae YJM789	YEAS7	Ascomycota	Saccharomycotina	Saccharomycetes	Saccharomycetales	Saccharomycetaceae	Saccharomyces	Saccharomyces cerevisiae
Sclerotinia sclerotiorum 1980 UF-70	SCLS1	Ascomycota	Pezizomycotina	Leotiomycetes	Helotiales	Sclerotiniaceae	Sclerotinia	Sclerotinia sclerotiorum
Serpula lacrymans var. lacrymans S7.3	SERL3	Basidiomycota	Agaricomycotina	Agaricomycetes	Boletales	Serpulaceae	Serpula	Serpula lacrymans
Sordaria macrospora k-hell	SORMK	Ascomycota	Pezizomycotina	Sordariomycetes	Sordariales	Sordariaceae	Sordaria	Sordaria macrospora
Spathaspora passalidarum NRRL Y-27907	SPAPN	Ascomycota	Saccharomycotina	Saccharomycetes	Saccharomycetales	Debaryomycetaceae	Spathaspora	Spathaspora passalidarum
Sporisorium reilianum SRZ2	SPORE	Basidiomycota	Ustilaginomycotina	Ustilaginomycetes	Ustilaginales	Ustilaginaceae	Sporisorium	Sporisorium reilianum
Talaromyces stipitatus ATCC 10500	TALSN	Ascomycota	Pezizomycotina	Eurotiomycetes	Eurotiales	Trichocomaceae	Talaromyces	Talaromyces stipitatus
Tetrapisispora phaffii CBS 4417	TETPH	Ascomycota	Saccharomycotina	Saccharomycetes	Saccharomycetales	Saccharomycetaceae	Tetrapisispora	Tetrapisispora phaffii
Thielavia terrestris NRRL 8126	THITE	Ascomycota	Pezizomycotina	Sordariomycetes	Sordariales	Chaetomiaceae	Thielavia	Thielavia terrestris
Torulaspora delbrueckii CBS 1146	TORDC	Ascomycota	Saccharomycotina	Saccharomycetes	Saccharomycetales	Saccharomycetaceae	Torulaspora	Torulaspora delbrueckii
Trichoderma atroviride IMI 206040	HYPAI	Ascomycota	Pezizomycotina	Sordariomycetes	Hypocreales	Hypocreaceae	Trichoderma	Trichoderma atroviride
Trichophyton rubrum CBS 118892	TRIRC	Ascomycota	Pezizomycotina	Eurotiomycetes	Onygenales	Arthrodermataceae	Trichophyton	Trichophyton rubrum
Yarrowia lipolytica CLIB122	YARLI	Ascomycota	Saccharomycotina	Saccharomycetes	Saccharomycetales	Dipodascaceae	Yarrowia	Yarrowia lipolytica
Zygosaccharomyces rouxii CBS 732	ZYGRC	Ascomycota	Saccharomycotina	Saccharomycetes	Saccharomycetales	Saccharomycetaceae	Zygosaccharomyces	Zygosaccharomyces rouxii

## Sheet: Metazoa
Organism	Mnemonic	Bilateria	Protostomia	Deuterostomia	Nematoda	Arthropoda	Mandibulata	Vertebrata	Insecta	Endopterygota	Diptera	Drosophila	Culicidae	Culicinae	Anopheles	Onchocercidae	Caenorhabditis	Actinopterygii	Sarcopterygii	Amniota	Mammalia	Carnivora	Rodentia
Aedes aegypti	AEDAE	+	+	–	–	+	+	–	+	+	+	–	+	+	–	–	–	–	–	–	–	–	–
Ailuropoda melanoleuca	AILME	+	–	+	–	–	–	+	–	–	–	–	–	–	–	–	–	–	+	+	+	+	–
Anopheles darlingi	ANODA	+	+	–	–	+	+	–	+	+	+	–	+	–	+	–	–	–	–	–	–	–	–
Anopheles gambiae	ANOGA	+	+	–	–	+	+	–	+	+	+	–	+	–	+	–	–	–	–	–	–	–	–
Branchiostoma floridae	BRAFL	+	–	+	–	–	–	–	–	–	–	–	–	–	–	–	–	–	–	–	–	–	–
Brugia malayi	BRUMA	+	+	–	+	–	–	–	–	–	–	–	–	–	–	+	–	–	–	–	–	–	–
Caenorhabditis elegans	CAEEL	+	+	–	+	–	–	–	–	–	–	–	–	–	–	–	+	–	–	–	–	–	–
Caenorhabditis remanei	CAERE	+	+	–	+	–	–	–	–	–	–	–	–	–	–	–	+	–	–	–	–	–	–
Canis familiaris	CANFA	+	–	+	–	–	–	+	–	–	–	–	–	–	–	–	–	–	+	+	+	+	–
Gallus gallus	CHICK	+	–	+	–	–	–	+	–	–	–	–	–	–	–	–	–	–	+	+	–	–	–
Culex quinquefasciatus	CULQU	+	+	–	–	+	+	–	+	+	+	–	+	+	–	–	–	–	–	–	–	–	–
Danio rerio	DANRE	+	–	+	–	–	–	+	–	–	–	–	–	–	–	–	–	+	–	–	–	–	–
Daphnia pulex	DAPPU	+	+	–	–	+	+	–	–	–	–	–	–	–	–	–	–	–	–	–	–	–	–
Drosophila melanogaster	DROME	+	+	–	–	+	+	–	+	+	+	+	–	–	–	–	–	–	–	–	–	–	–
Drosophila mojavensis	DROMO	+	+	–	–	+	+	–	+	+	+	+	–	–	–	–	–	–	–	–	–	–	–
Ixodes scapularis	IXOSC	+	+	–	–	+	–	–	–	–	–	–	–	–	–	–	–	–	–	–	–	–	–
Loa loa	LOALO	+	+	–	+	–	–	–	–	–	–	–	–	–	–	+	–	–	–	–	–	–	–
Mus musculus	MOUSE	+	–	+	–	–	–	+	–	–	–	–	–	–	–	–	–	–	+	+	+	–	+
Nematostella vectensis	NEMVE	–	–	–	–	–	–	–	–	–	–	–	–	–	–	–	–	–	–	–	–	–	–
Pediculus humanus	PEDHC	+	+	–	–	+	+	–	+	–	–	–	–	–	–	–	–	–	–	–	–	–	–
Rattus norvegicus	RAT	+	–	+	–	–	–	+	–	–	–	–	–	–	–	–	–	–	+	+	+	–	+
Tetraodon nigroviridis	TETNG	+	–	+	–	–	–	+	–	–	–	–	–	–	–	–	–	+	–	–	–	–	–
Trichoplax adhaerens	TRIAD	–	–	–	–	–	–	–	–	–	–	–	–	–	–	–	–	–	–	–	–	–	–
Tribolium castaneum	TRICA	+	+	–	–	+	+	–	+	+	–	–	–	–	–	–	–	–	–	–	–	–	–
Xenopus laevis	XENLA	+	–	+	–	–	–	+	–	–	–	–	–	–	–	–	–	–	+	–	–	–	–

## Sheet: Proteobacteria
Organism	Mnemonic	Class	Order	Family
Aeromonas hydrophila subsp. hydrophila ATCC 7966	AERHH	Gammaproteobacteria	Aeromonadales	Aeromonadaceae		Gammaproteobacteria	21
Alcanivorax borkumensis SK2	ALCBS	Gammaproteobacteria	Oceanospirillales	Alcanivoracaceae		Alphaproteobacteria	14
Marinobacter adhaerens HP15	MARAH	Gammaproteobacteria	Alteromonadales	Alteromonadaceae		Betaproteobacteria	8
Beijerinckia indica subsp. indica ATCC 9039	BEII9	Alphaproteobacteria	Rhizobiales	Beijerinckiaceae		Deltaproteobacteria	2
Nitrobacter hamburgensis X14	NITHX	Alphaproteobacteria	Rhizobiales	Bradyrhizobiaceae
Ochrobactrum anthropi ATCC 49188	OCHA4	Alphaproteobacteria	Rhizobiales	Brucellaceae
Ralstonia eutropha H16	CUPNH	Betaproteobacteria	Burkholderiales	Burkholderiaceae
Caulobacter crescentus NA1000	CAUCN	Alphaproteobacteria	Caulobacterales	Caulobacteraceae
Nitrosococcus halophilus Nc4	NITHN	Gammaproteobacteria	Chromatiales	Chromatiaceae
Delftia acidovorans SPH-1	DELAS	Betaproteobacteria	Burkholderiales	Comamonadaceae
Stigmatella aurantiaca DW4/3-1	STIAD	Deltaproteobacteria	Myxococcales	Cystobacterineae
Alkalilimnicola ehrlichii MLHE-1	ALHEH	Gammaproteobacteria	Chromatiales	Ectothiorhodospiraceae
Escherichia coli ETEC H10407	ECOH1	Gammaproteobacteria	Enterobacteriales	Enterobacteriaceae
Erythrobacter litoralis HTCC2594	ERYLH	Alphaproteobacteria	Sphingomonadales	Erythrobacteraceae
Ferrimonas balearica DSM 9799	FERBD	Gammaproteobacteria	Alteromonadales	Ferrimonadaceae
Gallionella capsiferriformans ES-2	GALCS	Betaproteobacteria	Gallionellales	Gallionellaceae
Hahella chejuensis KCTC 2396	HAHCH	Gammaproteobacteria	Oceanospirillales	Hahellaceae
Chromohalobacter salexigens DSM 3043	CHRSD	Gammaproteobacteria	Oceanospirillales	Halomonadaceae
Halothiobacillus neapolitanus c2	HALNC	Gammaproteobacteria	Chromatiales	Halothiobacillaceae
Hyphomicrobium sp. MC1	HYPSM	Alphaproteobacteria	Rhizobiales	Hyphomicrobiaceae
Hyphomonas neptunium ATCC 15444	HYPNA	Alphaproteobacteria	Rhodobacterales	Hyphomonadaceae
Idiomarina loihiensis L2TR	IDILO	Gammaproteobacteria	Alteromonadales	Idiomarinaceae
Legionella longbeachae NSW150	LEGLN	Gammaproteobacteria	Legionellales	Legionellaceae
Methylobacterium chloromethanicum CM4	METC4	Alphaproteobacteria	Rhizobiales	Methylobacteriaceae
Methylotenera versatilis 301	METS0	Betaproteobacteria	Methylophilales	Methylophilaceae
Acinetobacter baumannii TCDC-AB0715	ACIBD	Gammaproteobacteria	Pseudomonadales	Moraxellaceae
Pseudogulbenkiania sp. NH8B	PSEUL	Betaproteobacteria	Neisseriales	Chromobacteriaceae
Nitrosospira multiformis ATCC 25196	NITMU	Betaproteobacteria	Nitrosomonadales	Nitrosomonadaceae
Marinomonas mediterranea MMB-1	MARM1	Gammaproteobacteria	Oceanospirillales	Oceanospirillaceae
Herminiimonas arsenicoxydans	HERAR	Betaproteobacteria	Burkholderiales	Oxalobacteraceae
Pelobacter carbinolicus DSM 2380	PELCD	Deltaproteobacteria	Desulfuromonadales	Desulfuromonadaceae
Mesorhizobium loti MAFF303099	RHILO	Alphaproteobacteria	Rhizobiales	Phyllobacteriaceae
Thiomicrospira crunogena XCL-2	THICR	Gammaproteobacteria	Thiotrichales	Piscirickettsiaceae
Pseudoalteromonas haloplanktis TAC125	PSEHT	Gammaproteobacteria	Alteromonadales	Pseudoalteromonadaceae
Pseudomonas putida GB-1	PSEPG	Gammaproteobacteria	Pseudomonadales	Pseudomonadaceae
Psychromonas ingrahamii 37	PSYIN	Gammaproteobacteria	Alteromonadales	Psychromonadaceae
Agrobacterium tumefaciens str. C58	AGRT5	Alphaproteobacteria	Rhizobiales	Rhizobiaceae
Pseudovibrio sp. FO-BEG1	PSEUV	Alphaproteobacteria	Rhodobacterales	Rhodobacteraceae
Aromatoleum aromaticum EbN1	AROAE	Betaproteobacteria	Rhodocyclales	Rhodocyclaceae
Azospirillum sp. B510	AZOS1	Alphaproteobacteria	Rhodospirillales	Rhodospirillaceae
Shewanella piezotolerans WP3	SHEPW	Gammaproteobacteria	Alteromonadales	Shewanellaceae
Sphingobium japonicum UT26S	SPHJU	Alphaproteobacteria	Sphingomonadales	Sphingomonadaceae
Vibrio cholerae MJ-1236	VIBCJ	Gammaproteobacteria	Vibrionales	Vibrionaceae
Azorhizobium caulinodans ORS 571	AZOC5	Alphaproteobacteria	Rhizobiales	Xanthobacteraceae
Xanthomonas campestris pv. campestris str. 8004	XANC8	Gammaproteobacteria	Xanthomonadales	Xanthomonadaceae
